# Supplementary material for: Estimating Prevalence and Healthcare Utilization for Treatment-Resistant Depression in Japan: A Retrospective Claims Database Study
Source: Springer Nature journal article supplement (doi:10.1007/s40801-017-0126-5), 2017-11-28
Supplement: MOESM1 [file 24440572]

**TITLE:** Estimating Prevalence and Health Care Utilization for Treatment Resistant Depression  
in Japan: A Retrospective Claims Database study

**JOURNAL:** Drugs - Real World Outcomes

**AUTHORS:** Jörg Mahlich, Sunny Tsukazawa, Frank Wiegand

**CONTACT:** Jörg Mahlich; Janssen KK; joerg.mahlich@gmail.com

Supplementary Table 1.

Medication class and medications identified in the JMDC database

| <b>Medication class</b> | <b>Medications</b>                                                                                                                            |
|-------------------------|-----------------------------------------------------------------------------------------------------------------------------------------------|
| TrCA                    | amitriptyline hydrochloride, imipramine hydrochloride, trimipramine maleate, clomipramine hydrochloride, amoxapine, lofepramine hydrochloride |
| TeCA                    | nortriptyline hydrochloride, maprotiline hydrochloride, setiptiline maleate, mianserin hydrochloride                                          |
| SSRI                    | fluvoxamine maleate, paroxetine hydrochloride hydrate, sertraline hydrochloride, escitalopram                                                 |
| SNRI                    | milnacipran hydrochloride, duloxetine hydrochloride                                                                                           |
| NaSSA                   | mirtazapine                                                                                                                                   |
| Others                  | sulpiride, trazodone hydrochloride, pemoline                                                                                                  |

TrCA, Tricyclic antidepressant; TeCA, Tetracyclic antidepressant; SSRI, Selective serotonin reuptake inhibitor; SNRI, Serotonin and noradrenaline reuptake inhibitor; NaSSA, Noradrenergic and specific serotonergic antidepressant.
